# Supplementary material for: Design of a programmable biosensor-CRISPRi genetic circuits for dynamic and autonomous dual-control of metabolic flux in Bacillus subtilis
Source: PubMed Central journal article supplement — Nucleic Acids Res. 2019 Dec 4;48(2):996–1009. doi: 10.1093/nar/gkz1123 (PMC6954435; doi:10.1093/nar/gkz1123), 2019-12-04
Supplement: gkz1123_supplemental_file.pdf [file gkz1123_supplemental_file.pdf]

## Supplementary materials for

### **Design of a programmable biosensor-CRISPRi genetic circuits for dynamic and autonomous dual-control of metabolic flux in *Bacillus subtilis***

Yaokang Wu<sup>1,2</sup>, Taichi Chen<sup>1,2</sup>, Yanfeng Liu<sup>1,2</sup>, Rongzhen Tian<sup>1,2</sup>, Xueqin Lv<sup>1,2</sup>, Jianghua Li<sup>1,2</sup>, Guocheng Du<sup>2</sup>, Jian Chen<sup>2</sup>, Rodrigo Ledesma-Amaro<sup>3</sup>, Long Liu<sup>1,2,\*</sup>

<sup>1</sup> Key Laboratory of Carbohydrate Chemistry and Biotechnology, Ministry of Education, Jiangnan University, Wuxi 214122, China.

<sup>2</sup> Key Laboratory of Industrial Biotechnology, Ministry of Education, Jiangnan University, Wuxi 214122, China.

<sup>3</sup> Department of Bioengineering, Imperial College London, London SW7 2AZ, UK.

\* Corresponding author: Long Liu, Tel.: +86-510-85918312, Fax: +86-510-85918309, E-mail: longliu@jiangnan.edu.cn

**Table S1. Plasmids used in this study**

| Plasmid               | Characteristics                                                                                                                    | Source or reference |
|-----------------------|------------------------------------------------------------------------------------------------------------------------------------|---------------------|
| p7z6                  | ColE1 Amp <sup>r</sup> , lox71-Zeo-lox66                                                                                           | (1)                 |
| pTSC                  | ColE1 Amp <sup>r</sup> , RepF Em <sup>r</sup> P <sub>spac</sub> -cre, <i>E. coli</i> - <i>B. subtilis</i> shuttle vector           | (1)                 |
| pHT01                 | ColE1 Amp <sup>r</sup> , Cm <sup>r</sup> , <i>E. coli</i> - <i>B. subtilis</i> shuttle vector                                      | (2)                 |
| pSTOP1622             | ColE1 Amp <sup>r</sup> , RepB Tet <sup>r</sup> , <i>E. coli</i> - <i>B. subtilis</i> shuttle vector                                | (3)                 |
| pP43-GNA1             | ColE1 Amp <sup>r</sup> , RepB Km <sup>r</sup> , <i>E. coli</i> - <i>B. subtilis</i> shuttle vector, <i>GNA1</i> expressed from P43 | (4)                 |
| pP43-egfp             | ColE1 Amp <sup>r</sup> , RepB Km <sup>r</sup> , <i>E. coli</i> - <i>B. subtilis</i> shuttle vector, <i>egfp</i> expressed from P43 | (5)                 |
| pLCx-dCas9            | pMB1 Spec <sup>r</sup> , Cm <sup>r</sup> xylR-PxylA-dCas9 integrant expression at <i>lacA</i> locus of <i>B. subtilis</i>          | (6)                 |
| psga                  | pMB1 Spec <sup>r</sup> , Zeo <sup>r</sup> P <sub>veg</sub> -sgRNA integrant expression at <i>amyE</i> locus of <i>B. subtilis</i>  | (6)                 |
| psga-GFP              | psga derivate, contain sgRNA targeting to GFP                                                                                      | (6)                 |
| psga-zwf1-pfkA2-glmM2 | psga derivate, contain sgRNAs targeting to front of <i>zwf</i> , middle of <i>pfkA</i> , and middle of <i>glmM</i>                 | (6)                 |
| pHTa0                 | pHT01 derivate, $\Delta P_{grac}::egfp$                                                                                            | This study          |
| pHTaga                | pHTa0 derivate, P <sub>gamA</sub> - <i>egfp</i>                                                                                    | This study          |
| pHTave                | pHTa0 derivate, P <sub>veg</sub> - <i>egfp</i>                                                                                     | This study          |
| pHTavg1               | pHTa0 derivate, P <sub>vg1</sub> - <i>egfp</i>                                                                                     | This study          |
| pHTavg2               | pHTa0 derivate, P <sub>vg2</sub> - <i>egfp</i>                                                                                     | This study          |
| pHTavg3               | pHTa0 derivate, P <sub>vg3</sub> - <i>egfp</i>                                                                                     | This study          |
| pHTavg4               | pHTa0 derivate, P <sub>vg4</sub> - <i>egfp</i>                                                                                     | This study          |
| pHTavg5               | pHTa0 derivate, P <sub>vg5</sub> - <i>egfp</i>                                                                                     | This study          |
| pHTavg6               | pHTa0 derivate, P <sub>vg6</sub> - <i>egfp</i>                                                                                     | This study          |
| pHTavg7               | pHTa0 derivate, P <sub>vg7</sub> - <i>egfp</i>                                                                                     | This study          |
| pHTarg                | pHTa0 derivate, P <sub>rg</sub> - <i>egfp</i>                                                                                      | This study          |
| pHTalg                | pHTa0 derivate, P <sub>lg</sub> - <i>egfp</i>                                                                                      | This study          |
| pHTavg                | pHTa0 derivate, P <sub>vg</sub> - <i>egfp</i>                                                                                      | This study          |
| pHTasg                | pHTa0 derivate, P <sub>sg</sub> - <i>egfp</i>                                                                                      | This study          |
| pHTasg1               | pHTa0 derivate, P <sub>sg1</sub> - <i>egfp</i>                                                                                     | This study          |
| pHTasg2               | pHTa0 derivate, P <sub>sg2</sub> - <i>egfp</i>                                                                                     | This study          |
| pHTasg3               | pHTa0 derivate, P <sub>sg3</sub> - <i>egfp</i>                                                                                     | This study          |
| pHTcvg6               | pHTavg6 derivate, <i>gamR</i> -P <sub>vg6</sub> - <i>egfp</i>                                                                      | This study          |

|                    |                                                                                           |            |
|--------------------|-------------------------------------------------------------------------------------------|------------|
| pHTcga             | pHTaga derivative, <i>gamR</i> -P <sub>gamA</sub> - <i>egfp</i>                           | This study |
| pHTcsg2            | pHTasg2 derivative, <i>gamR</i> -P <sub>sg2</sub> - <i>egfp</i>                           | This study |
| pHTdsg2            | pHTcsg2 derivative, <i>xyIR</i> -P <sub>xyIA</sub> - <i>gamR</i>                          | This study |
| pHTcsg2m           | pHTcsg2 derivative, P <sub>sg2</sub> - <i>mcherry</i>                                     | This study |
| pLCv-dCas9         | pLCx-dCas9 derivative, $\Delta xyIR$ -P <sub>xyIA</sub> :: <i>gamR</i> -P <sub>vg6</sub>  | This study |
| pLCg-dCas9         | pLCx-dCas9 derivative, $\Delta xyIR$ -P <sub>xyIA</sub> :: <i>gamR</i> -P <sub>gamA</sub> | This study |
| pLCs-dCas9         | pLCx-dCas9 derivative, $\Delta xyIR$ -P <sub>xyIA</sub> :: <i>gamR</i> -P <sub>sg2</sub>  | This study |
| pSTv-GNA1          | pSTOP1622 derivative, $\Delta xyIR$ -P <sub>xyIA</sub> ::P <sub>vg6</sub> - <i>GNA1</i>   | This study |
| pSTg-GNA1          | pSTOP1622 derivative, $\Delta xyIR$ -P <sub>xyIA</sub> ::P <sub>gamA</sub> - <i>GNA1</i>  | This study |
| pSTs-GNA1          | pSTOP1622 derivative, $\Delta xyIR$ -P <sub>xyIA</sub> ::P <sub>sg2</sub> - <i>GNA1</i>   | This study |
| psga- <i>alsS1</i> | psga derivative, contain sgRNAs targeting to site1 of <i>alsS</i>                         | This study |
| psga- <i>alsS2</i> | psga derivative, contain sgRNAs targeting to site2 of <i>alsS</i>                         | This study |
| psga- <i>alsS3</i> | psga derivative, contain sgRNAs targeting to site3 of <i>alsS</i>                         | This study |
| psga- <i>alsS4</i> | psga derivative, contain sgRNAs targeting to site4 of <i>alsS</i>                         | This study |
| psga- <i>alsS5</i> | psga derivative, contain sgRNAs targeting to site5 of <i>alsS</i>                         | This study |

Table S2. Primers used in this study

| Primer                                    | Sequence                                                                |
|-------------------------------------------|-------------------------------------------------------------------------|
| <b>Fluorescence plasmids construction</b> |                                                                         |
| pHT01-li-F                                | <u>AACTGTACAAATAACTGCAGGT</u> CGACGTCCCCGGGGC                           |
| pHT01-li-R                                | TTTTCTCGAGGGT <u>ACCGCTATCACTTGGATCCGTACCAAGCTAATTCCGGTGGAAA</u><br>CG  |
| egfp-pHT01-F                              | <u>TAGCGGTACCCTCGAGAAAAGGAGGAAAAAAAATGGGTAAGGGAGAAGA</u> ACTTTT<br>CACT |
| egfp-pHT01-R                              | <u>CTGCAGTTATTTGTACAGTTCATCCATGCCATGTGTAATCC</u>                        |
| Pveg-pHTa0-F                              | <u>AATTAGCTTGGTACGGATCC</u> TTTTGTCAAATAATTTTATTGACAACGTCTTATTAAC<br>G  |
| Pveg-pHTa0-R                              | <u>CTCCTTTTCTCGAGGGTACCCGACATTTATTGTACAACACGAGCCCATT</u>                |
| PgamA-pHTa0-F                             | <u>AATTAGCTTGGTACGGATCC</u> CTTTTATAACAAATTTTCAGAAATTAATTGACAGTT<br>T   |
| PgamA-pHTa0-R                             | <u>CTCCTTTTCTCGAGGGTACCCGAGATAGACAAGCACCATATTTGTT</u>                   |
| vgTOvg1-F                                 | TAAATGTCGTAAATTGGTCATAACAAGGTACCCTCGAGAAAAGGAGGAAAAAAAAT<br>G           |
| vgTOvg1-R                                 | TCGAGGGTACCTTGTTATGACCAATTTACGACATTTATTGTACAACACGAGCCC                  |
| vgTOvg1-VF                                | AATGTCGTAAATTGGTCATAACAAGGTACC                                          |
| vgTOvg2                                   | GTATTGTTATGACCAATTTATGTCAAATAAAATTTAAATTATATCAACGTTAATAAGA<br>C         |
| vgTOvg2-F                                 | TTTGACATAAATTGGTCATAACAATACAATAAATGTCGGGTACCCTC                         |
| vgTOvg2-VF                                | ATTTTATTTGACATAAATTGGTCATAACAATACAA                                     |
| vgTOvg3-F                                 | GTTGATAAATTGGTCATAACAATTGACAAAAATGGGCTCGTG                              |
| vgTOvg3-R                                 | CCCATTTTTGTCAATTGTTATGACCAATTTATCAACGTTAATAAGACGTTGTCAATAA<br>A         |
| vgTOvg3-VF                                | CGTTGATAAATTGGTCATAACAATTGAC                                            |
| vg1TOvg4-F                                | TTTATTTGACATAAATTGGTCATAACAATACAATAAATGTCGTAAATTGGTCATAACA              |
| vg1TOvg4-R                                | GTATTGTTATGACCAATTTATGTCAAATAAAATTTAAATTATATCAACGTTAATAAGA<br>C         |
| vg1TOvg4-VF                               | TATTTGACATAAATTGGTCATAACAATACAATAAA                                     |
| vg1TOvg5-F                                | AACGTTGATAAATTGGTCATAACAATTGACAAAAATGGGCTCGTG                           |
| vg1TOvg5-R                                | TTTTGTCAATTGTTATGACCAATTTATCAACGTTAATAAGACGTTGTCAATAA                   |
| vg1TOvg5-VF                               | CGTTGATAAATTGGTCATAACAATTGAC                                            |
| vg2TOvg6-F                                | GTTGATAAATTGGTCATAACAATTGACATAAATTGGTCATAACAATACAATAAATG                |
| vg2TOvg6-R                                | CCAATTTATGTCAATTGTTATGACCAATTTATCAACGTTAATAAGACGTTGTCAATAA<br>A         |
| vg2TOvg6-VF                               | CGTTGATAAATTGGTCATAACAATTGACATA                                         |

---

|                |                                                                                 |
|----------------|---------------------------------------------------------------------------------|
| vg6TOvg7-F     | AATGTCGTA AATTGGTCATAACAAGGTACCCTCGAGAAAAGGAG                                   |
| vg6TOvg7-R     | GAGGGTACCTTGTTATGACCAATTTACGACATTTATTGTATTGTTATGACCAATTT                        |
| vg6TOvg7-VF    | AATGTCGTA AATTGGTCATAACAAGGTA                                                   |
| pHTaga-lin-F   | TAAATTCGTAATGACAAGTATCATAAATTGGTCATAACAATATGG                                   |
| pHTaga-lin-R   | GGATCCGTACCAAGCTAATTCCGG                                                        |
| PlepA-pHTaga-F | <u>AATTAGCTTGGTACGGATCCTCAATATGTTTTCAAAGCCGGAAAAGCG</u>                         |
| PlepA-pHTaga-R | <u>TACTTGTCATTACGAATTTATACACTAGCTTAGATTATATCAATAGGATTGTAAAGAT</u><br>TCAATGTAA  |
| PrelA-pHTaga-F | <u>AATTAGCTTGGTACGGATCCCGAGCTTTCTTACCTTGACGGC</u>                               |
| PrelA-pHTaga-R | <u>TACTTGTCATTACGAATTTACAAGAAAAAACGAAAGATGTAAAGAGCAGAAGT</u>                    |
| PsrfA-pHTaga-F | <u>AATTAGCTTGGTACGGATCCAATGTTTAGTGGAATGATTGCGGCAT</u>                           |
| PsrfA-pHTaga-R | <u>TACTTGTCATTACGAATTTAAATGAAAAAATGTTTTGTCAACGAAAAATGGGTGA</u><br>AAAGTTTCA     |
| Pveg-pHTaga-F  | <u>AATTAGCTTGGTACGGATCCTTTTTGTCAAATAATTTTATTGACAACGTCT</u>                      |
| Pveg-pHTaga-R  | <u>TACTTGTCATTACGAATTTACAACACGAGCCCATTTTTG</u>                                  |
| pHTa-pHTc-liF  | GGAATTAGCTTGGTACGGATCC                                                          |
| pHTa-pHTc-liR  | GGCACTAGTATAAAAAACGCC                                                           |
| gamR-pHTc-F    | <u>ATCCGTACCAAGCTAATTCATTCTGAAAATTTGTTATAAAAGAAGGATACAAATC</u><br>TT            |
| gamR-pHTc-R    | <u>GCGTTTTTTATACTAGTGCCTTATGAATGATATGACTGTTCTACGGTG</u>                         |
| pHTc-pHTd-liF  | GGAATTAGCTTGGTACGGATCC                                                          |
| pHTc-pHTd-liR  | ATGACAGCTTTTATATTCTGTTATCAAGTT                                                  |
| Pxyl-pHTd-F    | <u>ACAGAATATAAAGCTGTCATGGATCCCATTTCCCCCTTTGATTTTT</u>                           |
| Pxyl-pHTd-R    | <u>ATCCGTACCAAGCTAATTCCTGTAAGAAAAGCCCGCTCATTAGGCGGGCTGAACG</u><br>TCCCGGGGAGCTC |
| pHTcm-liF      | <u>TGGACGAGCTGTACAAGTAACTGCAGGTCGACGTCCCC</u>                                   |
| pHTcm-liR      | <u>CCAGTAGATTTTATAAACAATTTTTTTTCTCCTTTTCTCGAGGGTACC</u>                         |
| mcherry-pHTc-F | ATGTTTATGAAATCTACTGGTATTGTACGTATGGTGAGCAAGGGCGAG                                |
| mcherry-pHTc-R | TTACTTGTACAGCTCGTCCATGCC                                                        |

---

**Gene knockout and overexpression**

|          |                                                |
|----------|------------------------------------------------|
| nagB-L-F | ATATCCACGGCGGCTATG                             |
| nagB-L-R | <u>GCCATGGCATGATCTGGTCAGCCTCCTTG</u>           |
| nagB-R-F | <u>TCGACCTGCAGAAGGAACATGCTGACTTATGAATATCAA</u> |
| nagB-R-R | TTATTTTGAATGTAACGTATATAACCAATGAAGAG            |
| nagB-Z-F | <u>GCTGACCAGATCATGCCATGGCATGAGATTCT</u>        |
| nagB-Z-R | <u>GCATGTTCTTCTGCAGGTCGACGATTTACC</u>          |
| gamA-L-F | TGGCGGACATGGAATAAATCAC                         |

---

---

|            |                                                                        |
|------------|------------------------------------------------------------------------|
| gamA-L-R   | <u>TAGAGGATCCCCGCACAATAAAAGGAGACTGTCATGTTTAAAAAG</u>                   |
| gamA-R-F   | <u>CGACCTGCAGTGACACCCCCTCAAAGAG</u>                                    |
| gamA-R-R   | TCCCCACAGCACTTTTCCAT                                                   |
| gamA-Z-F   | <u>TCCTTTTATTGTGCGGGATCCTCTAGAGATTGT</u>                               |
| gamA-Z-R   | <u>GGGGTGTCACTGCAGGTCGACGATTCTACC</u>                                  |
| gamR-L-F   | AATTCCTCCGCCTGAGAACG                                                   |
| gamR-L-R   | <u>GATCCCCGGGTACCATGTTTAAAAAGGCATTTCAAATTCTGCAG</u>                    |
| gamR-R-F   | <u>TCGACCTGCAGAGCAATGTGTTTTAAGAAGGGAATGGT</u>                          |
| gamR-R-R   | AGCACGATCATAAATGTATAGCTCCTGG                                           |
| gamR-Z-F   | <u>CCTTTTTAAACATGGTACCCGGGGATCCTCT</u>                                 |
| gamR-Z-R   | <u>AAACACATTGCTCTGCAGGTCGACGATTCTACC</u>                               |
| alsSD-L-F  | TCTTTGCGGTAAGCGATAACCCAT                                               |
| alsSD-L-R  | <u>CTCGAATTCGTAACACCCTCACTCCTTATTATGCATTTTAAACGTAAAATTTTAAATA</u><br>T |
| alsSD-R-F  | <u>GCACTGGCCGTCAAGAAAAAAGAAAGCCCCTTTTAGCAGG</u>                        |
| alsSD-R-R  | TATTGTCGTATGCTGTGTCGAAACCTTACA                                         |
| alsSD-Z-F  | <u>GGAGTGAGGGTGTTACGAATTCGAGCTCGGTACC</u>                              |
| alsSD-Z-R  | <u>TTCTTTTTTTCTTGACGGCCAGTGCCA</u>                                     |
| ptsG-L-F   | GAGCTGAGGATCGTGAATGG                                                   |
| ptsG-L-R   | <u>CTTCGTATAATGTATGCTATACGAACGGTAAAGAATTGACCTCCTCTTTTTACTAGT</u>       |
| ptsG-R-F   | <u>CGGTACCATTATAGGTAAGAGAGGAATGTACACATGTTTAAAGCATTATTCGGCGT</u>        |
| ptsG-R-R   | GGACTGGAGCAACGAATAAGAA                                                 |
| ptsG-C-F   | <u>AATTCCTTACCGTTCGTATAGCATAACATTATACGAAGTTATGCCATAGTACTGGCG</u><br>AT |
| ptsG-C-R   | <u>ATACCGTTCGTATAATGTATGCTATACGAAGTTATTTATTGGTATGACTGGTTTTAA</u><br>GC |
| ptsG-P43-F | <u>AATAACTTCGTATAGCATAACATTATACGAACGGTATGATAGGTGGTATGTTTTCGC</u>       |
| ptsG-P43-R | <u>GTGTACATTCCTCTCTTACCTATAATGG</u>                                    |
| pgi-L-F    | GCGGAGGCAGTGTGATTGA                                                    |
| pgi-L-R    | <u>CGGTATCTCTAGAGGATCCCCGGTGCTTGTCCTCCATAACG</u>                       |
| pgi-R-F    | <u>CGGTACCATTATAGGTAAGAGAGGAATGTACACATGACGCATGTACGCTTT</u>             |
| pgi-R-R    | GTTCAAGCCGTCAAGATCGTTA                                                 |
| pgi-Z-F    | <u>CCGGGGATCCTCTAGAGA</u>                                              |
| pgi-Z-R    | <u>CATACCACCTATCAGTCGACGATTTACCGTTCCG</u>                              |
| pgi-P43-F  | <u>GGTAAATCGTCGACTGATAGGTGGTATGTTTTCGCT</u>                            |
| pgi-P43-R  | <u>GTGTACATTCCTCTCTTACCTATAATGG</u>                                    |

---

**CRISPRi**

---

|                |                                                                         |
|----------------|-------------------------------------------------------------------------|
| pLCx-dCas9-liF | <u>GAGAAAAGGAGGATGTACACATGGATAAGAAATACTCAATAGGCTTAGCTATCGG</u>          |
| pLCx-dCas9-liR | TCCGCTATCCTGCCAATCTGGCAATATAGCGGATTTCTGTTCTGAATTAACGGAATT<br>CCGTACCGTT |
| Biosen-dCas9-F | <u>CAGATTGGCAGGATAGCGGATTTTTCTTTTTCTACCTTATGCTTCAGAACGCTCGGT</u><br>TG  |
| Biosen-dCas9-R | GTGTACATCCTCCTTTTTCTCGAGGGTACCG                                         |
| sg-MF          | GTTTTAGAGCTAGAAATAGCAAGTTAAAATAAGGCTAGTC                                |
| sg-alsS1-R     | TTCTAGCTCTAAACTTGTGAAAACAGAGGGGCGACATTTATTGTACAACACGAG<br>CCC           |
| alsS1-VF       | ATGTCGCCCTCTGTTTTTCACAA                                                 |
| sg-alsS2-R     | TTCTAGCTCTAAACCTTTTGTGAGCTTCCGCAAACATTTATTGTACAACACGAGC<br>CC           |
| sg-alsS2-VF    | AAATGTTTGCGGAAAGCTCACAAAAG                                              |
| sg-alsS3-R     | TTCTAGCTCTAAACGATCTTGAATTGATCGGTGAACATTTATTGTACAACACGAGC<br>CC          |
| sg-alsS3-VF    | AATGTTACCGATCAATTCAAGATC                                                |
| sg-alsS4-R     | TTCTAGCTCTAAACGGAGAAAAAGTGGTTTCTGTACATTTATTGTACAACACGAGC<br>CC          |
| sg-alsS4-VF    | AAATGTACAGAAACCACTTTTTCTCC                                              |
| sg-alsS5-R     | TTCTAGCTCTAAACAAAGAATTCCGGGAACTCATACTTTATTGTACAACACGAGC<br>CC           |
| sg-alsS5-VF    | ATGTATGAGTTCCCCGAATTCTTT                                                |
| thrC-sgRNA-LF  | GCTTCCTGACCATCATCCGC                                                    |
| thrC-sgRNA-LR  | <u>CCATGGCATGGACCGGGATCGCTAAAACAT</u>                                   |
| thrC-sgRNA-RF  | <u>CATGGATGAGCCGGAATGCTGGAAACATCAC</u>                                  |
| thrC-sgRNA-RR  | ACGACTACGTCAATGTCAGCATTCCG                                              |
| thrC-sgRNA-ZF  | <u>ATCCCGGTCCATGCCATGGCATGAGATTCTACC</u>                                |
| thrC-sgRNA-ZR  | <u>CAGCATTTCCGGCTCATCCATGTCGACGGAATTCA</u>                              |

---

**GNA1 expression plasmids**

|                |                                                           |
|----------------|-----------------------------------------------------------|
| pSTOP1622-li-F | TTCACCGGTCCAAGAATTGG                                      |
| pSTOP1622-li-R | TTAAGTGAACGCAAAGGTTAGCA                                   |
| Pbiosen-pST-F  | <u>TAACCTTTGCGTTCACCTTAAGGAATTAGCTTGGTACGGATCCCT</u>      |
| PgamA-pST-R    | <u>ATAATGGTACCGCTATCACTGAGATAGACAAGCACCATATTTGTT</u>      |
| Psg2-pST-R     | <u>ATAATGGTACCGCTATCACTGAGATAGACAAGCACCATATTTGTTATG</u>   |
| PgamA-pST-R    | <u>ATAATGGTACCGCTATCACTCGACATTTATTGTATTGTTATGACCAATTT</u> |
| GNA1-pST-F     | AGTGATAGCGGTACCATTATAGG                                   |
| GNA1-pST-R     | <u>CCAATCTTGGACCGGTGAATTAAGCGCTGGGTCAAAAATTACAGTCA</u>    |

---

**RT-qPCR**

|              |                          |
|--------------|--------------------------|
| GNA1(qPCR)-F | CGATTTGAGGCGATGAGAACA    |
| GNA1(qPCR)-R | TCAACACGACCCCTTGATCC     |
| zwf(qPCR)-F  | CAATGGAGCCGCCTATCAA      |
| zwf(qPCR)-R  | CAGGAACCGGTACACCGTCA     |
| pfkA(qPCR)-F | ACGCGGCAAGAAGCACAGTA     |
| pfkA(qPCR)-R | GGTCAGCAGCACTCGGAGAA     |
| glmM(qPCR)-F | TCATCCTTGCGACACACCT      |
| glmM(qPCR)-R | CCGAGATCCGCGTTTTTCTC     |
| rpsj(qPCR)-F | ACAAATACAAAGATTCTCGTGAGC |
| rpsJ(qPCR)-R | CTAATCGCATAAGAGCATCAACAG |

---

Underlined letters represent homologous sequences for fusion PCR, inverse PCR or Seamless Cloning.



Table S3. Sequences of genetic parts used in this study.

| Part name         | Type     | Sequence                                                                                                                                                                                                                                                                                                      |
|-------------------|----------|---------------------------------------------------------------------------------------------------------------------------------------------------------------------------------------------------------------------------------------------------------------------------------------------------------------|
| P <sub>43</sub>   | promoter | TGATAGGTGGTATGTTTTCGCTTGAACTTTTAAATACAGCCATTGAACATACGGTTGATTTAATAACTGA<br>CAAACATCACCCCTCTTGCTAAAGCGGCCAAGGACGCTGCCGCCGGGGCTGTTTGCCTTTTTGCCGTG<br>ATTTTCGTGTATCATTGGTTTACTTATTTTTTTGCCAAAGCTGTAATGGCTGAAAATTCTTACATTTATTT<br>ACATTTTTAGAAATGGGCGTGAAAAAAGCGCGGATTATGTAAAATATAA                                |
| P <sub>gamA</sub> | promoter | CTTTTATAACAAATTTTCAGAAATTAATAATTGACAGTTTGATAAGGGCGGTGCT <b>TAATTTCGTAATGACA</b><br>AGTATCATA <b>TAATTGGTCATAACAA</b> ATATGGTGCTTGTCTATCTC                                                                                                                                                                     |
| P <sub>veg</sub>  | promoter | TTTTGTCAAATAATTTTATTGACAACGCTTATTAACGTTGATATAATTTAAATTTTATTGACAAAAATG<br>GGCTCGTGTGTACAATAAATGT                                                                                                                                                                                                               |
| P <sub>vg1</sub>  | promoter | TTTTGTCAAATAATTTTATTGACAACGCTTATTAACGTTGATATAATTTAAATTTTATTGACAAAAATG<br>GGCTCGTGTGTACAATAAATGTCGTA <b>TAATTGGTCATAACAA</b>                                                                                                                                                                                   |
| P <sub>vg2</sub>  | promoter | TTTTGTCAAATAATTTTATTGACAACGCTTATTAACGTTGATATAATTTAAATTTTATTGACATA <b>TAATT</b><br><b>GGTCATAACAA</b> TACAATAAATGT                                                                                                                                                                                             |
| P <sub>vg3</sub>  | promoter | TTTTGTCAAATAATTTTATTGACAACGCTTATTAACGTTGATA <b>TAATTGGTCATAACAA</b> TTGACAAAA<br>TGGGCTCGTGTGTACAATAAATGT                                                                                                                                                                                                     |
| P <sub>vg4</sub>  | promoter | TTTTGTCAAATAATTTTATTGACAACGCTTATTAACGTTGATATAATTTAAATTTTATTGACATA <b>TAATT</b><br><b>GGTCATAACAA</b> TACAATAAATGTCGTA <b>TAATTGGTCATAACAA</b>                                                                                                                                                                 |
| P <sub>vg5</sub>  | promoter | TTTTGTCAAATAATTTTATTGACAACGCTTATTAACGTTGATA <b>TAATTGGTCATAACAA</b> TTGACAAAA<br>TGGGCTCGTGTGTACAATAAATGTCGTA <b>TAATTGGTCATAACAA</b>                                                                                                                                                                         |
| P <sub>vg6</sub>  | promoter | TTTTGTCAAATAATTTTATTGACAACGCTTATTAACGTTGATA <b>TAATTGGTCATAACAA</b> TTGACATA <b>AA</b><br><b>TTGGTCATAACAA</b> TACAATAAATGT                                                                                                                                                                                   |
| P <sub>vg7</sub>  | promoter | TTTTGTCAAATAATTTTATTGACAACGCTTATTAACGTTGATA <b>TAATTGGTCATAACAA</b> TTGACATA <b>AA</b><br><b>TTGGTCATAACAA</b> TACAATAAATGTCGTA <b>TAATTGGTCATAACAA</b>                                                                                                                                                       |
| P <sub>rg</sub>   | promoter | CGAGCTTCTTACCTTGACGGCAGAAATAAGCTCGAAGATTACGACATCTAACATTGATGAAATACTA<br>AGGATAACCGCATAACGAAAAAGCACTCCATGTCAGGGTGCTTTTTTCTATTGTTTTGCATTTATTTTA<br>TATAATTTTGGCTATTTGAACTTCTGCTCTTACATCTTTTCGTTTTTTTCTTG <b>TAATTTCGTAATGACAA</b><br>GTATCATA <b>TAATTGGTCATAACAA</b> ATATGGTGCTTGTCTATCTC                       |
| P <sub>lg</sub>   | promoter | TCAATATGTTTTCAAAGCCGGAAAAGCGCTTTCGGACACCGTAACCAATACTGCCAGTCAATGTATG<br>AATGGATACGGGATATGAATCAATAAGTACGTGAAAGAGAAAAGCAACCCAGATATGATAGGGAACTT<br>TTCTCTTTCTGTTT <b>TACATT</b> GAATCTTTACAATCCTATTGATAAATCTAAGCTAGTGTA <b>TAATTTCGTA</b><br><b>ATGACAA</b> GTATCATA <b>TAATTGGTCATAACAA</b> ATATGGTGCTTGTCTATCTC |
| P <sub>vg</sub>   | promoter | TTTTGTCAAATAATTTTATTGACAACGCTTATTAACGTTGATATAATTTAAATTTTATTGACAAAAATG<br>GGCTCGTGTGT <b>TAATTTCGTAATGACA</b> AGTATCATA <b>TAATTGGTCATAACAA</b> ATATGGTGCTTGTCTAT<br>CTC                                                                                                                                       |
| P <sub>sg</sub>   | promoter | AATGTTTAGTGAAATGATTGCGGCATCCCGCAAAAAATATTGCTGTAATAAACTGGAATCTTTCGGC<br>ATCCCGCATGAAACTTTTACCCATTTTTCGTTGACAAAAACATTTTTTTCATT <b>TAATTTCGTAATGACA</b><br><b>AGTATCATAAATTGGTCATAACAA</b> ATATGGTGCTTGTCTATCTC                                                                                                  |
| P <sub>sg1</sub>  | promoter | AATGTTTAGTGAAATGATTGCGGCATCCCGCAAAAAATATTGCTGTAATAAACTGGAATCTTTCGGC<br>ATCCCGCATGAAACTTTTACCCATTTTTCGTTGACATA <b>TAATTGGTCATAACAA</b> TA <b>TAATTTCGTAATGAC</b>                                                                                                                                               |

---

|                        |          |                                                                                       |
|------------------------|----------|---------------------------------------------------------------------------------------|
|                        |          | <b>AAGTATCATAAATTGGTCATAACAAATATGGTGCTTGTCTATCTC</b>                                  |
|                        |          | AATGTTTAGTGAAATGATTGCGGCATCCCGCAAAAATATTGCTGTAAATAAACTGGAATCTTTCGGC                   |
| P <sub>sg2</sub>       | promoter | ATCCCGCATGAACTTTTCACCCATTTTTCG <b>TAAATTGGTCATAACAA</b> <u>TTGAC</u> AAAAACATTTTTCAT  |
|                        |          | <b>TTAAATTCGTAATGACA</b> AGTATCATAAATTGGTCATAACAAATATGGTGCTTGTCTATCTC                 |
|                        |          | AATGTTTAGTGAAATGATTGCGGCATCCCGCAAAAATATTGCTGTAAATAAACTGGAATCTTTCGGC                   |
| P <sub>sg3</sub>       | promoter | ATCCCGCATGAACTTTTCACCCATTTTTCG <b>TAAATTGGTCATAACAA</b> <u>TTGACATAAA</u> TTGGTCATAAC |
|                        |          | <b>AAATAAATTCGTAATGACA</b> AGTATCATAAATTGGTCATAACAAATATGGTGCTTGTCTATCTC               |
| sgRNA <sub>zwf1</sub>  |          | CGAAGATCCTCATTAGACCAGTTTTAGAGCTAGAAATAGCAAGTTAAAATAAGGCTAGTCCGTTATCAA                 |
| -                      |          | CTTGAAAAAGTGGCACCGAGTCGGTGCTTTTTTTGAATTCGCCACCGTCGACCTGCAGGCTTATTAA                   |
| sgRNA <sub>pfkA</sub>  | sgRNA    | CGTTGATATAATTTAAATTTTATTGACAAAAATGGGCTCGTGTGTACAATAAATGTCCGATTGTA                     |
| 2 <sup>-</sup>         | array    | TCAGTGCCGTTTTAGAGCTAGAAATAGCAAGTTAAAATAAGGCTAGTCCGTTATCAACTGAAAAAGTG                  |
| sgRNA <sub>glmM</sub>  |          | GCACCGAGTCGGTGCTTTTTT                                                                 |
| 2                      |          |                                                                                       |
| sgRNA <sub>alss1</sub> | sgRNA    | CGCCCTCTGTTTTTACAAGTTTTAGAGCTAGAAATAGCAAGTTAAAATAAGGCTAGTCCGTTATCAA                   |
|                        |          | CTTGAAAAAGTGGCACCGAGTCGGTGCTTTTTT                                                     |
| sgRNA <sub>alss2</sub> | sgRNA    | TTGCGGAAAGCTCACAAAAGTTTTAGAGCTAGAAATAGCAAGTTAAAATAAGGCTAGTCCGTTATCAA                  |
|                        |          | CTTGAAAAAGTGGCACCGAGTCGGTGCTTTTTT                                                     |
| sgRNA <sub>alss3</sub> | sgRNA    | TCACCGATCAATCAAGATCGTTTTAGAGCTAGAAATAGCAAGTTAAAATAAGGCTAGTCCGTTATCAA                  |
|                        |          | CTTGAAAAAGTGGCACCGAGTCGGTGCTTTTTT                                                     |
| sgRNA <sub>alss4</sub> | sgRNA    | ACAGAAACCACTTTTTCTCCGTTTTAGAGCTAGAAATAGCAAGTTAAAATAAGGCTAGTCCGTTATCAA                 |
|                        |          | CTTGAAAAAGTGGCACCGAGTCGGTGCTTTTTT                                                     |
| sgRNA <sub>alss5</sub> | sgRNA    | ATGAGTTCGCCGAATCTTTGTTTTAGAGCTAGAAATAGCAAGTTAAAATAAGGCTAGTCCGTTATCAA                  |
|                        |          | CTTGAAAAAGTGGCACCGAGTCGGTGCTTTTTT                                                     |
|                        |          | ATGGATAAGAAATACTCAATAGGCTTAGCTATCGGCACAAATAGCGTCGGATGGGCGGTGATCACTGA                  |
|                        |          | TGAATATAAGGTTCCGTCTAAAAAGTTCAAGGTTCTGGGAAATACAGACCGCCACAGTATCAAAAAA                   |
|                        |          | TCTTATAGGGGCTCTTTTATTGACAGTGGAGAGACAGCGGAAGCGACTCGTCTCAAACGGACAGCTC                   |
|                        |          | GTAGAAGGTATACACGTCGGAAGAATCGTATTTGTTATCTACAGGAGATTTTTCAAATGAGATGGCGA                  |
|                        |          | AAGTAGATGATAGTTTCTTTCATCGACTTGAAGAGTCTTTTTGGTGAAGAAGACAAGAAGCATGAAC                   |
|                        |          | GTCATCTATTTTTGGAAATATAGTAGATGAAGTTGCTTATCATGAGAAATATCCAATCTATCATCT                    |
|                        |          | GCGAAAAAATTGGTAGATTCTACTGATAAAGCGGATTTGCGCTTAATCTATTTGGCCTTAGCGCATAT                  |
|                        |          | GATTAAGTTTCGTGGTCATTTTTGATTGAGGGAGATTTAAATCCTGATAATAGTATGTGGACAACTA                   |
|                        |          | TTTATCCAGTTGGTACAAACCTACAATCAATTTTGAAGAAAACCTATTAACGCAAGTGGAGTAGAT                    |
| dCas9                  | gene     | GCTAAAGCGATTCTTCTGCACGATTGAGTAAATCAAGACGATTAGAAAATCTCATTGCTCAGTCCCC                   |
|                        |          | GGTGAGAAGAAAATGGCTTATTTGGGAATCTCATTGCTTTGTCATTGGGTTTGACCCCTAATTTTAAAT                 |
|                        |          | CAAATTTTGATTTGGCAGAAGATGCTAAATTACAGCTTTCAAAGATACTTACGATGATGATTTAGATAA                 |
|                        |          | TTTATTGGCGCAAATTGGAGATCAATATGCTGATTTGTTTTGGCAGCTAAGAATTTATCAGATGCTATT                 |
|                        |          | TTACTTTCAGATATCCTAAGAGTAAATACTGAAATACTAAGGCTCCCTATCAGCTTCAATGATTAAC                   |
|                        |          | GCTACGATGAACATCATCAAGACTTGA                                                           |
|                        |          | CTTTTAAAAGCTTTAGTTGACAACA                                                             |
|                        |          | ACTTCCAGAAAAGT                                                                        |
|                        |          | ATAAAGAAATCTTTTTGATCAATCAAAAAACGGATATGCAGGTTATATTGATGGGGGAGCTAGCCAAG                  |
|                        |          | AAGAATTTTATAAATTTATCAAACCAATTTTAGAAAAATGGATGGTACTGAGGAATTATTGGTGAACT                  |
|                        |          | AAATCGTGAAGATTTGCTGCGCAAGCAACGGACCTTTGACAACGGCTCTATTCCCATCAAATCACTT                   |
|                        |          | GGGTGAGCTGCATGCTATTTTGAAGACAAGAAGACTTTTTATCCATTTTTAAAGACAATCGTGAGAA                   |

---

GATTGAAAAAATCTTGACTTTTCGAATTCCTTATTATGTTGGTCCATTGGCGCGTGGCAATAGTCGTTTT  
GCATGGATGACTCGGAAGTCTGAAGAAACAATTACCCCATGGAATTTTGAAGAAGTTGTCGATAAAGG  
TGCTTCAGCTCAATCATTTATTGAACGCATGACAACTTTGATAAAAAATCTTCAAATGAAAAAGTACTA  
CCAAAAATAGTTTGTCTTATGAGTATTTTACGGTTTATAACGAATTGACAAAGGTCAAATATGTTACTG  
AAGGAATGCGAAAACCAGCATTCTTTTCAGGTGAACAGAAGAAAGCCATTGTTGATTTACTCTTCAAAA  
CAAATCGAAAAGTAACCGTTAAGCAATTAAGAAGATTATTTCAAAAAATAGAATGTTTTGATAGTGT  
TGAAATTTTCAGGAGTTGAAGATAGATTTAATGCTTCATTAGGTACCTACCATGATTTGCTAAAAATTATT  
AAAGATAAAGATTTTTTGGATAATGAAGAAAATGAAGATATCTTAGAGGATATTGTTTTAACATTGACCT  
TATTTGAAGATAGGGAGATGATTGAGGAAAGACTTAAACATATGCTCACCTCTTTGATGATAAGGTGA  
TGAAACAGCTTAAACGTCGCCGTTATACTGGTTGGGGACGTTTGTCTCGAAAATTGATTAATGGTATTA  
GGGATAAGCAATCTGGCAAAACAATATTAGATTTTTTGAATCAGATGGTTTTGCCAATCGCAATTTTAT  
GCAGCTGATCCATGATGATAGTTTGACATTTAAGAAGACATTCAAAAAGCACAAGTGTCTGGACAAG  
GCGATAGTTTACATGAACATATTGCAAATTTAGCTGGTAGCCCTGCTATTA AAAAAGGTATTTTACAGA  
CTGTA AAAAGTTGTTGATGAATTGGTCAAAGTAATGGGGCGGCATAAGCCAGAAAATATCGTTATTGAAA  
TGGCACGTGAAAATCAGACAACTCAAAGGGCCAGAAAATTCGCGAGAGCGTATGAAACGAATCGAA  
GAAGGTATCAAAGAATTAGGAAGTCAGATTCTTAAAGAGCATCCTGTTGAAAATACTCAATTGCAAAAT  
GAAAAGCTCTATCTCTATTATCTCCAAAATGGAAGAGACATGTATGTGGACCAAGAATTAGATATTAAT  
CGTTTAAAGTGATTATGATGTCGATGCCATTGTTCCACAAGTTTCCTTAAAGACGATTCAATAGACAATA  
AGGTCTTAAACGCGTTCTGATAAAAAATCGTGGTAAATCGGATAACGTTCCAAGTGAAGAAGTAGTCAAAA  
AGATGAAAAACTATTGGAGACAACCTCTAAACGCCAAGTTAATCACTCAACGTAAGTTTGATAATTTAAC  
GAAAGCTGAACGTGGAGTTTGTAGTGAACCTGATAAAGCTGGTTTTATCAAACGCCAATTGGTTGAAA  
CTCGCCAAATCACTAAGCATGTGGCACAAATTTGGATAGTCGCATGAATACTAAATACGATGAAAATG  
ATAAACTTATTTCGAGAGGTTAAAGTGATTACCTTAAATCTAAATTAGTTTCTGACTTCCGAAAAGATT  
CCAATTCTATAAAGTACGTGAGATTAACAATTACCATCATGCCATGATGCGTATCTAAATGCCGTCGT  
TGGAAGTCTTTGATTAAGAAATATCCAAAACCTGAATCGGAGTTTGTCTATGGTGATTATAAAGTTTAT  
GATGTTTCGTA AAAATGATTGCTAAGTCTGAGCAAGAAATAGGCAAAGCAACCGCAAAAATTTCTTTTAC  
TCTAATATCATGAACCTTCTCAAACAGAAATTACACTTGCAAATGGAGAGATTGCAAAACGCCCTCTA  
ATCGAAAATAATGGGGAAACTGGAGAAATTGTCTGGGATAAAGGGCGAGATTTTGCACAGTGGCGAA  
AGTATTGTCCATGCCCCAAGTCAATATTGTCAAGAAAACAGAAAGTACAGACAGGCGGATTCTCCAAGG  
AGTCAATTTTACAAAAAGAAATTCGGACAAGCTTATTGCTCGTAAAAAAGACTGGGATCCAAAAAAT  
ATGGTGGTTTTGATAGTCCAACGGTAGCTTATTCAGTCTAGTGGTTGCTAAGGTGGAAAAAGGGAAA  
TCGAAGAAGTTAAAATCCGTTAAAGAGTTACTAGGGATCACAATTATGAAAAGAGTTCTTTGAAAAA  
AATCCGATTGACTTTTTAGAAAGCTAAAGGATATAAGGAAGTTAAAAAAGACTTAATCATTAACTACCTA  
AATATAGTCTTTTTGAGTTAGAAAACGGTCGTAACGGATGCTGGCTAGTGCCGGAGAATTACAAAAA  
GGAAATGAGCTGGCTCTGCCAAGCAAATATGTGAATTTTTTATTTAGCTAGTCATTATGAAAAGTTGA  
AGGGTAGTCCAGAAGATAACGAACAAAAACAATTGTTTGTGGAGCAGCATAAGCATTATTTAGATGAGA  
TTATTGAGCAAATCAGTGAATTTTCTAAGCGTGTATTTTACAGATGCCAATTTAGATAAAGTTCTTAG  
TGCAATAACAAACATAGAGACAAACCAATACGTGAACAAGCAGAAAATATTATTCAATTTATTTACGTTG  
ACGAATCTTGGAGCTCCCGCTGCTTTTAAATATTTTGATACAACAATTGATCGTAAACGATATACGTCTA  
CAAAAAGAGTTTTAGATGCCACTCTTATCCATCAATCCATCACTGGTCTTTATGAAACACGCATTGATT  
GAGTCAGCTAGGAGGTGACTAA

*gamR*

gene

ATGACAGCTTTATATTCTGTTATCAAGTTTAAATCATTGAGTTAATTAATCGGGCAAATATCAGGCGA  
ATGATCAGCTGCCGACGGAGAGTGAATTTTGCACAATATGATGTCAGCAGAACTGTGAGACTG  
GCTCTGCAGCAGCTAGAGCTTGAAGGATATATTAAGAATTCAAGGAAAAGGGACATTTGTATCGGC

GGCCAAAATACAAACGCCGATTCCGCATAAGATTACGAGCTTTGCAGAACAAATGAGAGGACTTCGTT  
 CTGAATCAAAAGTGCTTGAGCTTGTGGTATTCTGCGGATCATTCCATCGCCGAGCTTTTGAAAATGA  
 AAGAGAATGAACCTGTCAACAAGCTTGTCAAGTGCAGAGTCAGATACGCCGAGGGGAACTTTGCAGTATCAT  
 ACCTCATATATTCCCTGGAAGGCGGCACCGGGGCTGGCGCAGGAGGAATGCACCGGCTCGCTGTTT  
 GAATTGTTAAGGACAAAATACAATATTGAAATCAGCAGGGGCACGGAATCGATCGAACCGATTTTAAC  
 GGATGAAACGATCAGCGGACACTTATTAACCAATGTCGGAGCGCCTGCGTTTTATCAGAATCCCTTA  
 CCTATGATAAAAATGAAGAAGTGGTGAATATGCGCAAATTATTACACGGGGAGACCGAACGAAATTC  
 ACCGTAGAACAGTCATATCATTCAATA  
 ATGGGTAAGGGAGAAGAACTTTTCACTGGAGTTGTCCAATTCTTGTGAATTAGATGGTGATGTTAAT  
 GGGCACAAATTTTCTGTCAGTGGAGAGGGTGAAGGTGATGCAACATACGGAAAACCTTACCCTTAAATT  
 TATTTGCACTACTGAAAAGCTGCCTGTTCTTGGCCAACACTTGTCACTACTCTTACTTATGGTGTTCA  
 ATGCTTTTCAAGATACCCAGATCATATGAAGCGGCACGACTTCTTCAAGAGCGCCATGCCTGAGGGAT  
 ACGTGCAGGAGAGGACCATCTTCTCAAGGACGACGGGAACTACAAGACACGTGCTGAAGTCAAGTT  
*egfp* gene TGAGGGAGACACCCTCGTCAACAGAATCGAGCTTAAGGGAATCGATTTCAAGGAGACGGAAACATC  
 CTCGGCCACAAGTTGGAATCAACTACAACCTCCACAACGTATACATCATGGCAGACAAACAAAAGAA  
 TGGAATCAAAGTTAACTTCAAAATTAGACACAACATTGAAGATGGAAGCGTTCAACTAGCAGACCATTA  
 TCAACAAAATACTCCAATTGGCGATGGCCCTGTCTTTTACCAGACAACCTTACCTGTCCACACAATC  
 TGCCCTTTGAAAGATCCCAACGAAAAGAGAGACCACATGGTCCTTCTTGAGTTTGTAAACAGCTGCTG  
 GGATTACACATGGCATGGATGAACTGTACAAATAA  
 ATGTTTATGAAATCTACTGGTATTGTACGTATGGTGAGCAAGGGCGAGGAGGATAACATGGCCATCAT  
 CAAGGAGTTCATGCGCTTCAAGGTGCACATGGAGGGCTCCGTGAACGGCCACGAGTTCGAGATCGAG  
 GCGGAGGGCGAGGGCCGCCCTACGAGGGCACCCAGACCGCCAAGCTGAAGGTGACCAAGGGTGG  
 CCCCCTGCCCTTCGCCTGGGACATCCTGTCCCCTCAGTTCATGTACGGCTCCAAGGCCCTACGTGAAG  
 CACCCCGCCGACATCCCCGACTACTTGAAGCTGTCTTCCCCGAGGGCTTCAAGTGGGAGCGCGTGA  
*mcherry* gene TGAATTCGAGGACGGCGGCGTGGTACCCTGACCCAGGACTCCTCCCTGCAGGACGGCGAGTTCA  
 TCTACAAGGTGAAGCTGCGCGGCACCAACTTCCCCTCCGACGGCCCCGTAATGCAGAAGAAGACCAT  
 GGGCTGGGAGGCCTCCTCCGAGCGGATGTACCCCGAGGACGGCGCCCTGAAGGGCGAGATCAAGC  
 AGAGGCTGAAGCTGAAGGACGGCGGCCACTACGACGCTGAGGTCAAGACCACCTACAAGGCCAAGA  
 AGCCCGTGCAGCTGCCCGGCGCCTACAACGTCAACATCAAGTTGGACATCACCTCCCACAACGAGGA  
 CTACACCATCGTGAACAGTACGAACGCGCCGAGGGCCGCCACTCCACCGCGGCATGGACGAGCT  
 GTACAAGTAA  
 ATGAGCCATATCTTCGACGCATCTGTACTGGCTCCACATATTCTAGTAACCTTCTGATAATTTCAAG  
 GTGAGACCACTGGCAAAGGATGATTTTTCGAAGGGATATGTCGACCTGCTGTACAATTGACGTCAGT  
 TGGAACCTTGACCAAGAAGCATTTGAGAAACGATTTGAGGCGATGAGAACAAGCGTACCGAATTATC  
*GNA1* gene ACATCGTAGTAATTGAGGATTCCAACAGCCAGAAAGTGGTGGCGTCTGCTAGTTTGGTTGTTGAAATG  
 AAATTCATTCATGGGGCCGATCAAGGGGTCGTGTTGAAGATGTTGTCGTCGATACAGAAATGCGCC  
 GGCAAAAATTAGGTGCCGTGCTTTTAAAAACTTTGGTGTCACTTGGCAAATCTTTAGGCGTCTACAAAA  
 TAAGCCTCGAATGCGTCCCGAATTACTCCCGTCTATTCCCAATTTGGCTTTCAGGATGACTGTAATT  
 TTATGACCCAGCGCTTTTAA

Underlined letters represent -10 and -35 region, and bold letters represent GamR binding site.

sgRNAs targeting sites on non-template strand of *alsS*:

TTGACAAAAGCAACAAAAGAACAAAATCCC**TTGTGAAAAACAGAGGGGCG**GAGCTTGTTGTTGATTGCT  
TAGTGGAGCAAGGTGTCACACATGTATTTGGCATTCCAGGTGCAAAAATTGATGCGGTATTTGACGCTTT  
ACAAGATAAAGGACCTGAAATTATCGTTGCCCGGCACGAACAAAACGCAGCATTTCATGGCCCAAGCAGT  
CGGCCGTTTAACTGGAAAACCGGGAGTCGTGTTAGTCACATCAGGACCGGGTGCCTCTAACTTGGCAAC  
AGGCCTGCTGACAGCGAACACTGAAGGAGACCCTGTCGTTGCGCTTGTGAAACGTGATCCGTGCAGA  
TCGTTTAAAACGGACACATCAATCTTTGGATAATGCGGCGCTATTCCAGCCGATTACAAAATACAGTGTAG  
AAGTTCAAGATGTAAAAATATACCGGAAGCTGTTACAAATGCATTTAGGATAGCGTCAGCAGGGCAGGC  
TGGGGCCG**CTTTTGTGAGCTTTCCGCAA**GATGTTGTGAATGAAGTCAAAATACGAAAAACGTGCGTGCT  
GTTGCAGCGCCAAAACCTCGGTCCTGCAGCAGATGATGCAATCAGTGCGGCCATAGCAAAAATCCAAACA  
GCAAAACTTCTGTCTGTTTTGGTCGGCATGAAAGGCGGAAGACCGGAAGCAATTAAGCGGTTTCGCAAG  
CTTTTAAAAAGGTTTCAGCTTCCATTTGTTGAAACATATCAAGCTGCCGGTACCCTTTCTAGAGATTTAGA  
GGATCAATATTTTGGCCGTATCGGTTTTGTTCCGCAACCAGCCTGGCGATTTACTGCTAGAGCAGGCAGAT  
GTTGTTCTGACGATCGGCTATGACCCGATTGAATATGATCCGAAATTCTGGAATATCAATGGAGACCGGA  
CAATTATCCATTTAGACGAGATTATCGCTGACATTGATCATGCTTACCAGCCT**GATCTTGAATTGATCGGT**  
**GA**CATTCCGTCCACGATCAATCATATCGAACACGATGCTGTGAAAGTGGAATTTGCAGAGCGTGAGCAGA  
AAATCCTTTCTGATTTAAAACAATATATGCATGAAGGTGAGCAGGTGCCTGCAGATTGGAAATCAGACAGA  
GCGCACCTCTTGAAATCGTTAAAGAGTTGCGTAATGCAGTCGATGATCATGTTACAGTAACTTGCATAT  
CGGTTTCGCACGCCATTTGGATGTCACGTTATTTCCGCAGCTACGAGCCGTTAACATTAATGATCAGTAAC  
GGTATGCAAACACTCGGCGTTGCGCTTCTTTGGCAATCGGCGCTTCATTGGTGAAACCG**GGAGAAAA**  
**GTGGTTTCTGT**CTCTGGTGACGGCGGTTTTCTTATTCTCAGCAATGGAATTAGAGACAGCAGTTCTGACTAA  
AAGCACCATTGTACACATTGTATGGAACGACAGCACATATGACATGGTTGCATTCCAGCAATTGAAAAAA  
TATAACCGTACATCTGCGGTGATTTCCGAAATATCGATATCGTGAAATATGCGGAAAGCTTCCGGAGCAA  
CTGGCTTGCAGTAGAATCACCAGACCAGCTGGCAGATGTTCTGCGTCAAGGCATGAACGCTGAAGGTC  
CTGTCATCATCGATGTCCCGGTTGACTACAGTGATAACATTAATTTAGCAAGTGACAAGCTTCCG**AAAGAA**  
**TTCCGGGAACCTCAT**GAAAACGAAAGCTCTCTAG

### **Supplementary method: protocol of *B. subtilis* transforming**

#### **Protocol:**

- 1) 2 ml SPI culture were inoculated overnight from a fresh colony at 37 °C in a 14 mL disposable tube, with 220 rpm shaking.
- 2) The following morning, 40µL of the culture was diluted with 2 ml fresh SPI and continued incubation at 37 °C with 220 rpm shaking for 4-5 h.
- 3) 200 µL of the culture was mixed with 2mL fresh SPII with continued incubation at 37 °C for additional 1.5-2 h.
- 4) 20µL EGTA (10mM) was added into the culture, and the competent cells was obtained after additional 10 min shake cultivation.
- 5) 500µL of the competent cells was divided into 1.5 mL sterile tubes, and then incubated at 37 °C for 1.5-2 h after adding 0.5-2 µg DNA into every tube.
- 6) After centrifuged (4500g) for 2 min, the cell pellet was gently resuspended in 150-200 µL of the saved supernatant and then plated onto LB agar plates with selective antibiotic(s).

#### **Medias:**

- a) Every 2mL SPI contains 980 µL SPI-A, 980 µL SPI-B, 20 µL Glucose (50%), and 20 µL CAYE;
- b) Every 2mL SPII contains 1960 µL SPI, 20 µL CaCl<sub>2</sub> (5 mM), and 20 µL MgCl<sub>2</sub> (250mM);
- c) SPI-A contains 4 g/L (NH<sub>4</sub>)<sub>2</sub>SO<sub>4</sub>, 28 g/L K<sub>2</sub>HPO<sub>4</sub>·3H<sub>2</sub>O, 12 g/L KH<sub>2</sub>PO<sub>4</sub>, and 2 g/L sodium citrate;
- d) SPI-B was 0.4 g/L Mg<sub>2</sub>SO<sub>4</sub>·7H<sub>2</sub>O;
- e) CAYE contains 20 g/L casamino acid and 100 g/L yeast extract;
- f) SPI-A, SPI-B, 50% Glucose, CAYE, 5 mM CaCl<sub>2</sub>, 250mM MgCl<sub>2</sub>, and 10 mM EGTA (adjusting pH to 8.0 by NaOH) were sterilized at 121 °C for 15 min separately.

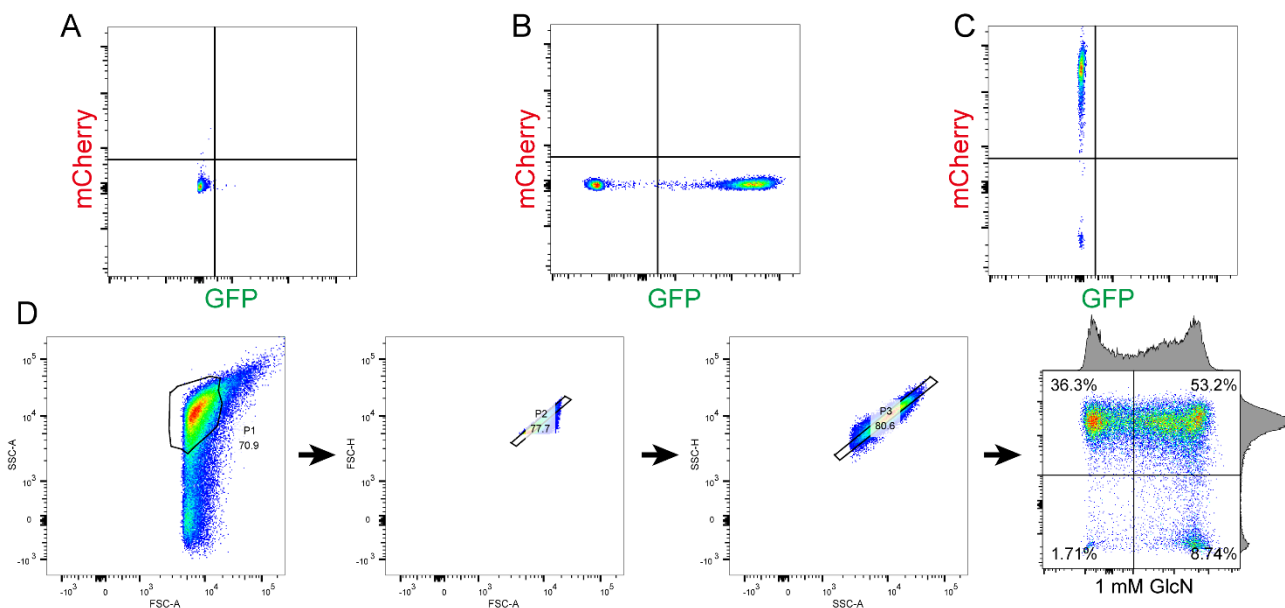

**Figure S1.** Flow cytometry analysis of negative sample (A) and single positive samples of GFP (B) and mCherry (C). (D) The gates used in flow cytometry analysis to reduce false events.

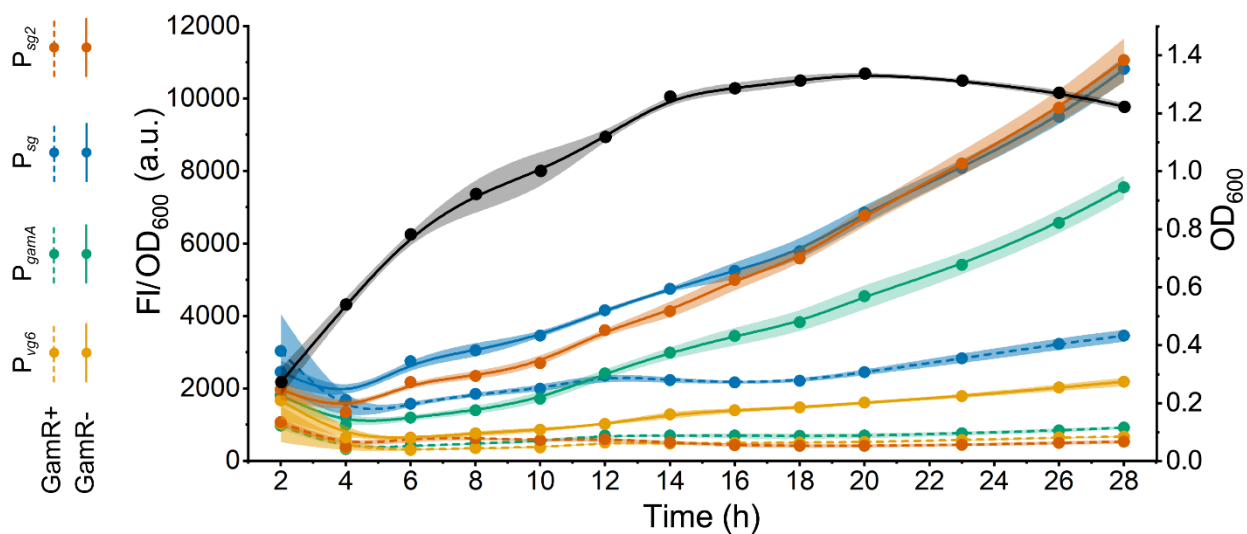

**Figure S2.** Expression properties of P<sub>vg6</sub>, P<sub>gamA</sub>, P<sub>sg</sub>, and P<sub>sg2</sub> over times.

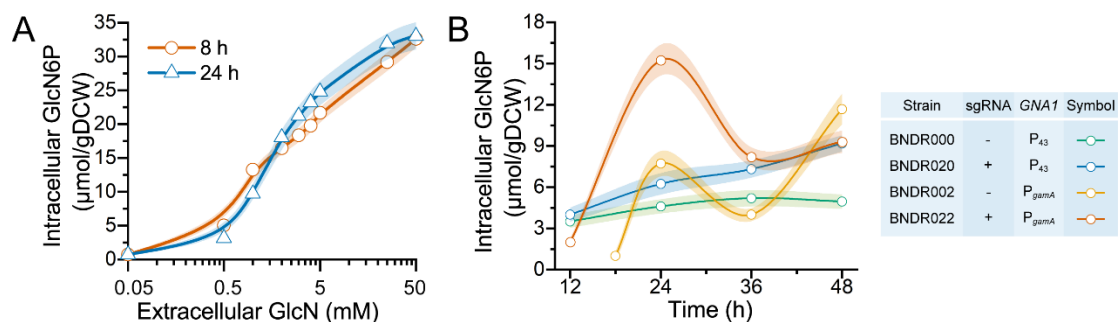

**Figure S3. Intracellular GlcN6P concentration measured by LCMS.** (A) Relationship between the extracellular GlcN added into the media and the intracellular GlcN6P. (B) The variation tendency of intracellular GlcN6P in the engineered strains. All data were the average of three independent studies with standard deviations.

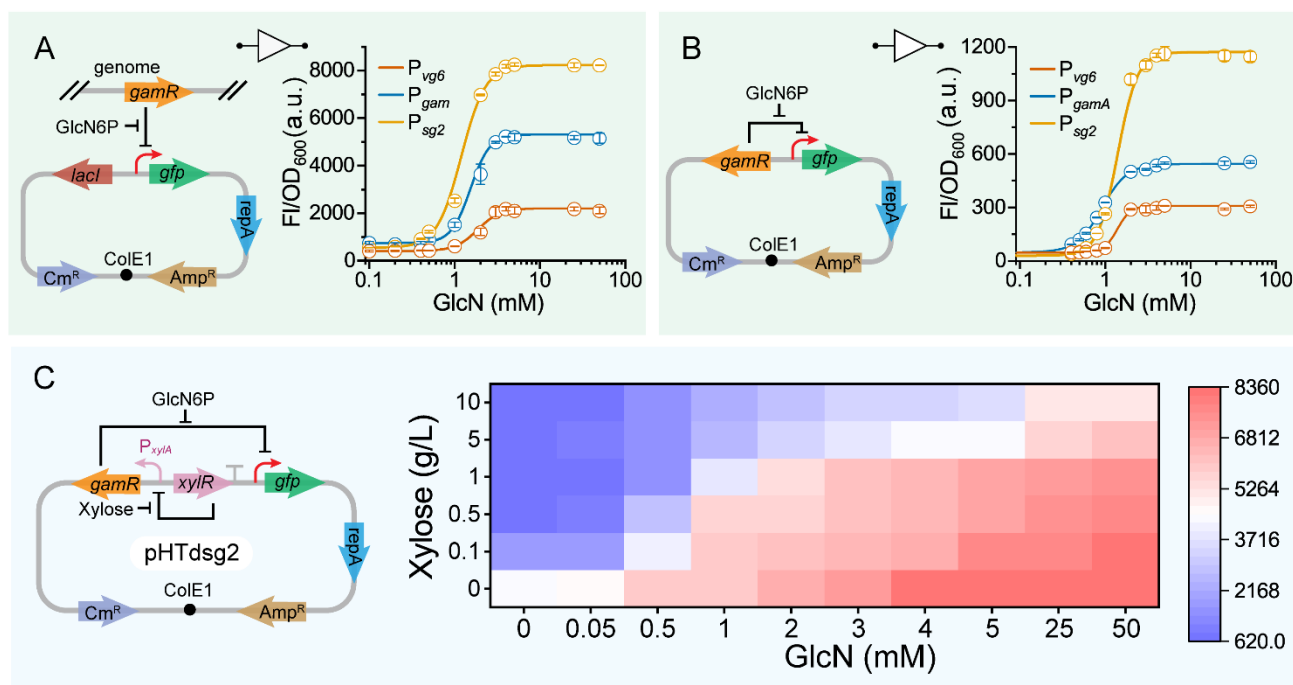

**Figure S4. GlcN6P biosensors mediated transcription activation.** (A) The dose-dependent property of the GlcN6P biosensors to GlcN6P in strain BS02 (*B. subtilis* 168 $\Delta$ nagB $\Delta$ gamA). (B) The dose-dependent property of the GlcN6P biosensors in minimal media. (C) Effects of GamR expression on the biosensor response. All data were the average of three independent studies with standard deviations.



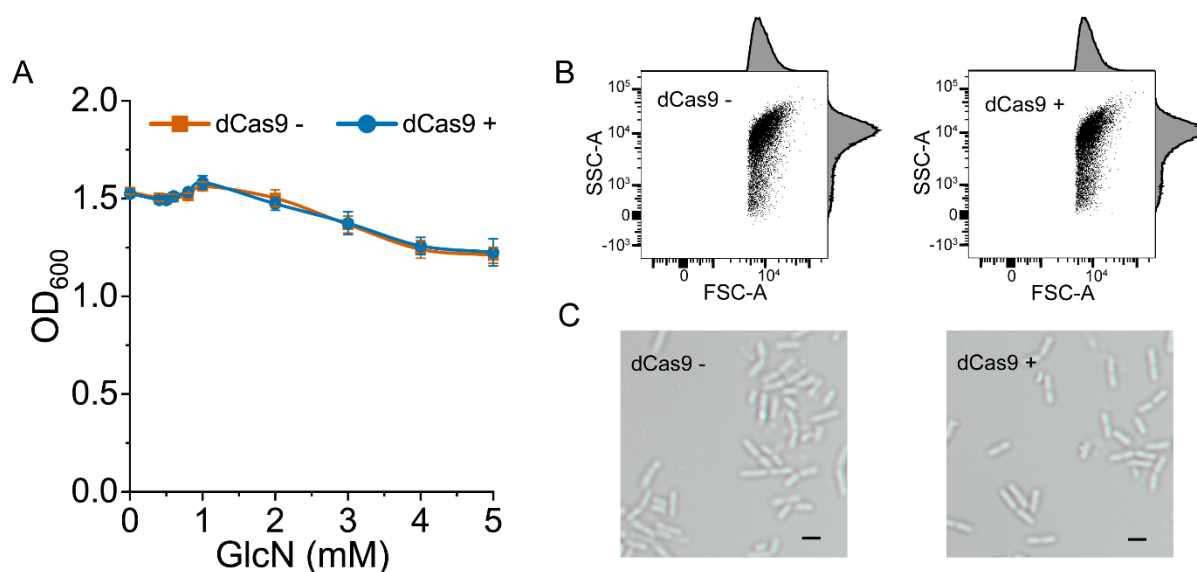

**Figure S5. Evaluation the toxicity of dCas9 in the repression cascade.** (A) Effect of dCas9 expression on cell growth. OD<sub>600</sub> was measured at 20h. Intracellular accumulation of GlcN6P is weakly toxic to the cell, but there is no difference in growth between strain expressing dCas9 and a control without dCas9. (B) FSC-A/SSC-A distribution of strain expressing dCas9 and a control without dCas9 were measured by flow cytometry. (C) Microscopic images of strain expressing dCas9 and a control without dCas9. The scale bars are 2 μm.

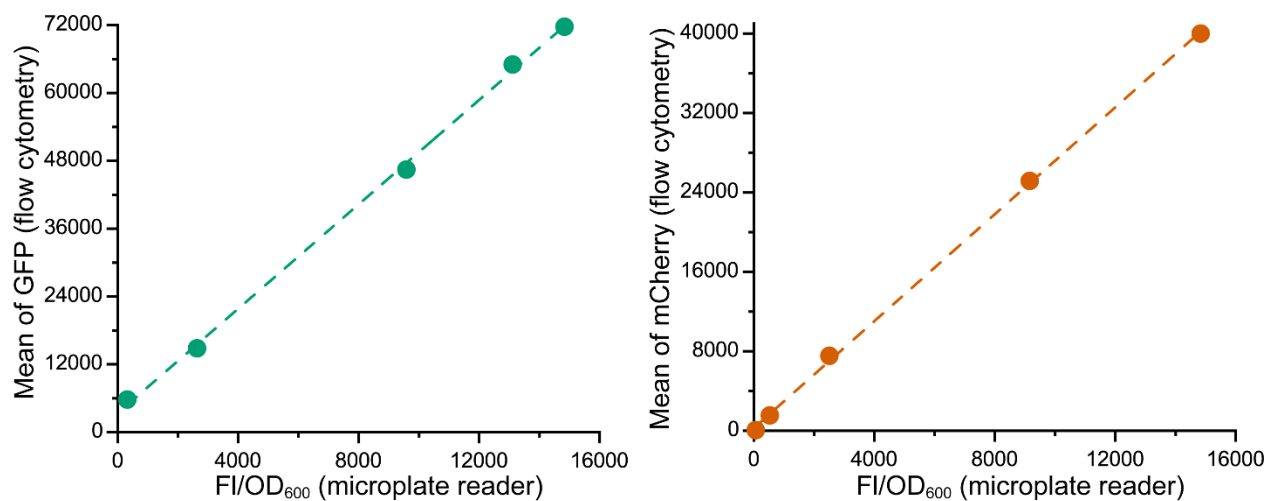

**Figure S6. The relationships between fluorescence measured by flow cytometry and microplate reader.**

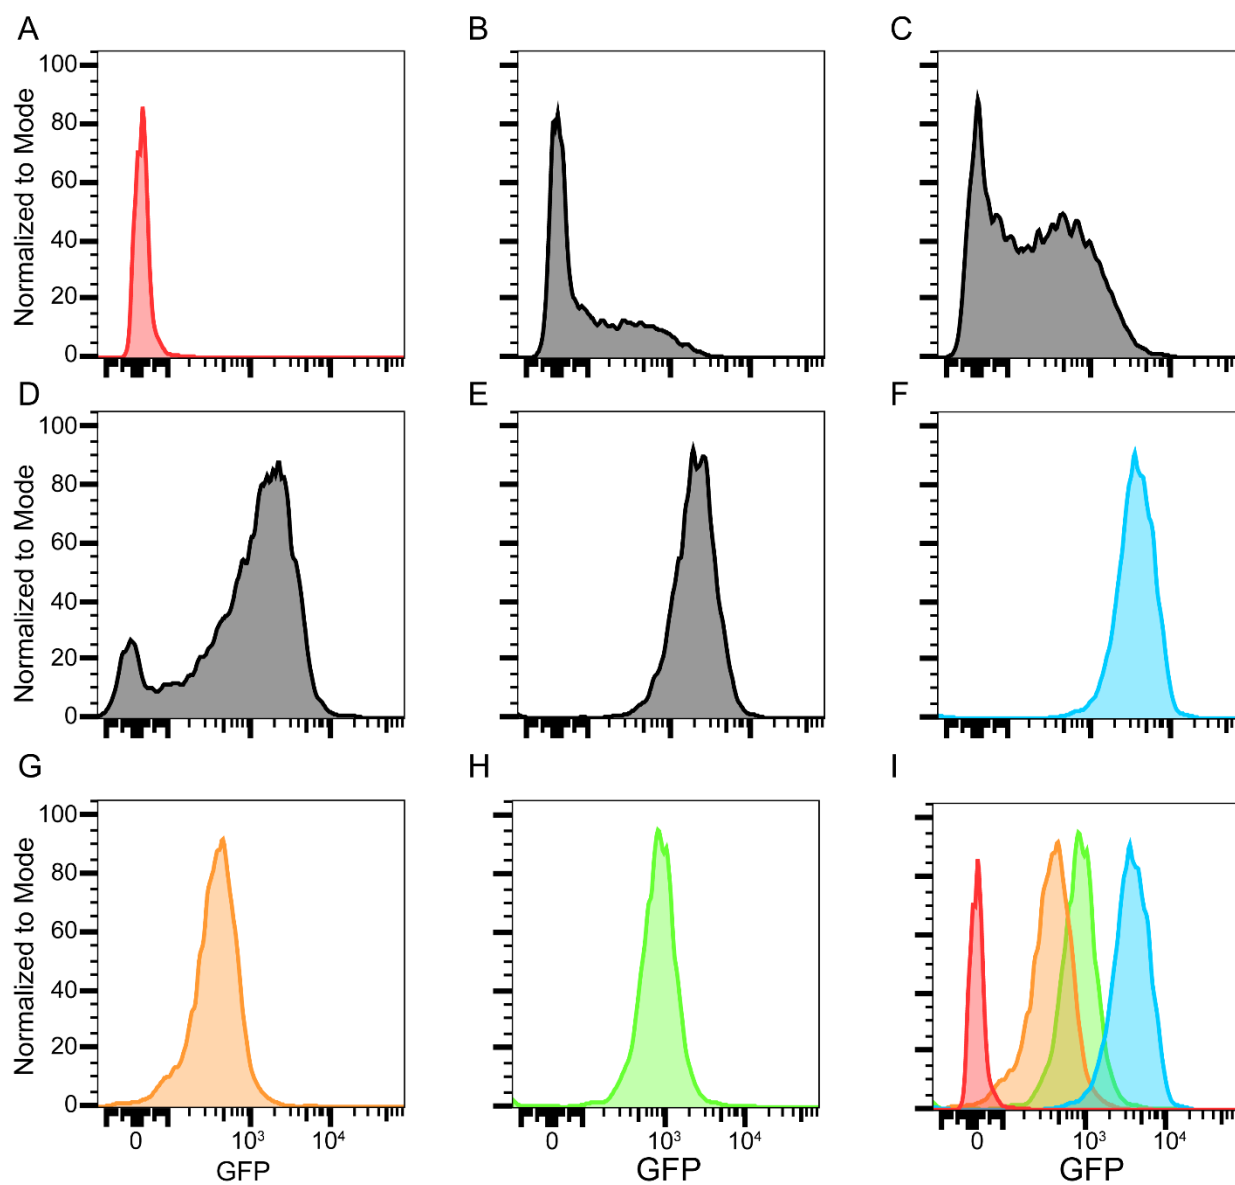

**Figure S7.** Flow cytometry analysis of pHTcsg2 in strain BS03 (A-F, LB media containing GlcN 0mM, 0.4mM, 0.5mM, 0.8 mM, 1 mM, and 4 mM, respectively), BNY0 (G, LB media without GlcN), and BNX0 (H, LB media without GlcN). (I) Overlays of A, F, G, and H.

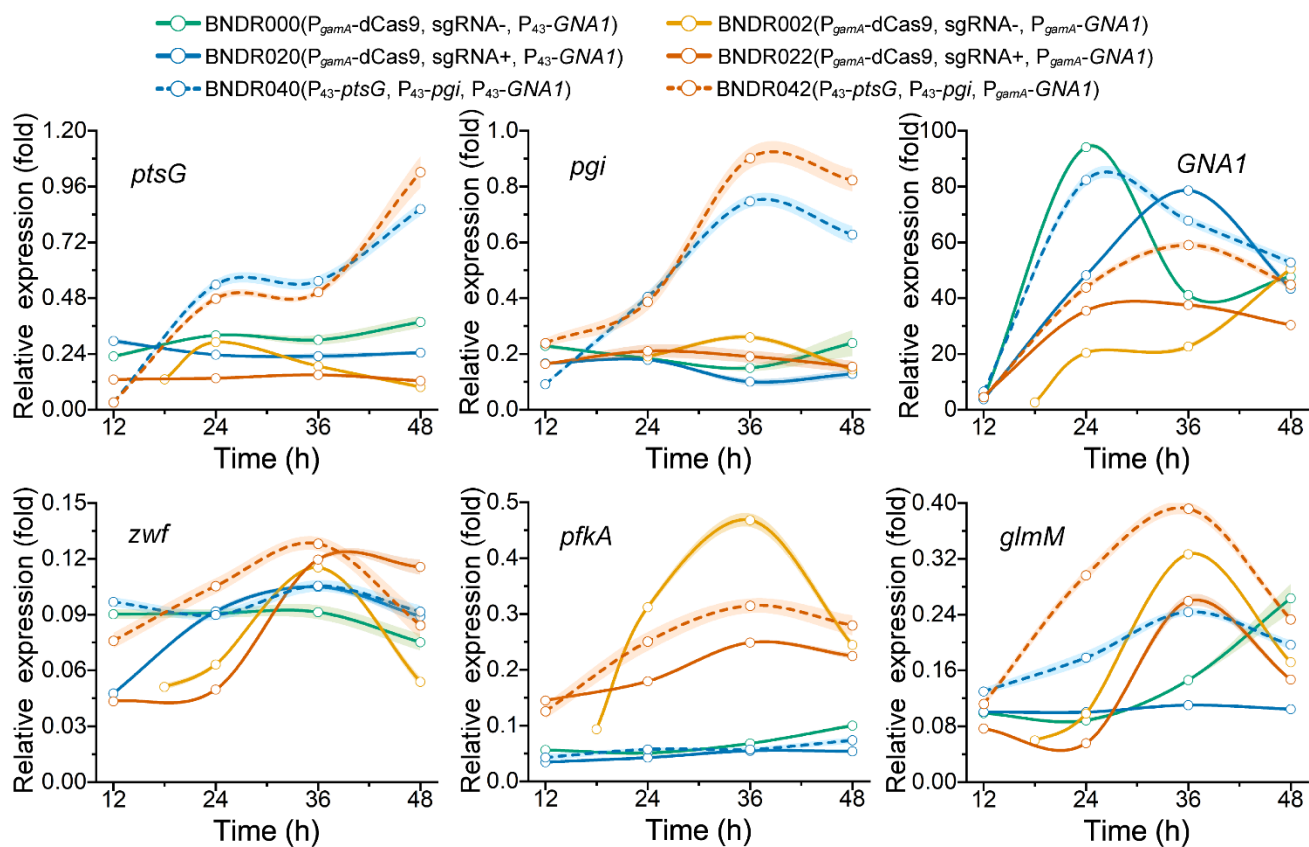

**Figure S8. Relative transcription expression levels of the regulated genes to the reference gene *rpsJ*.** All data were the average of three independent studies with standard deviations.

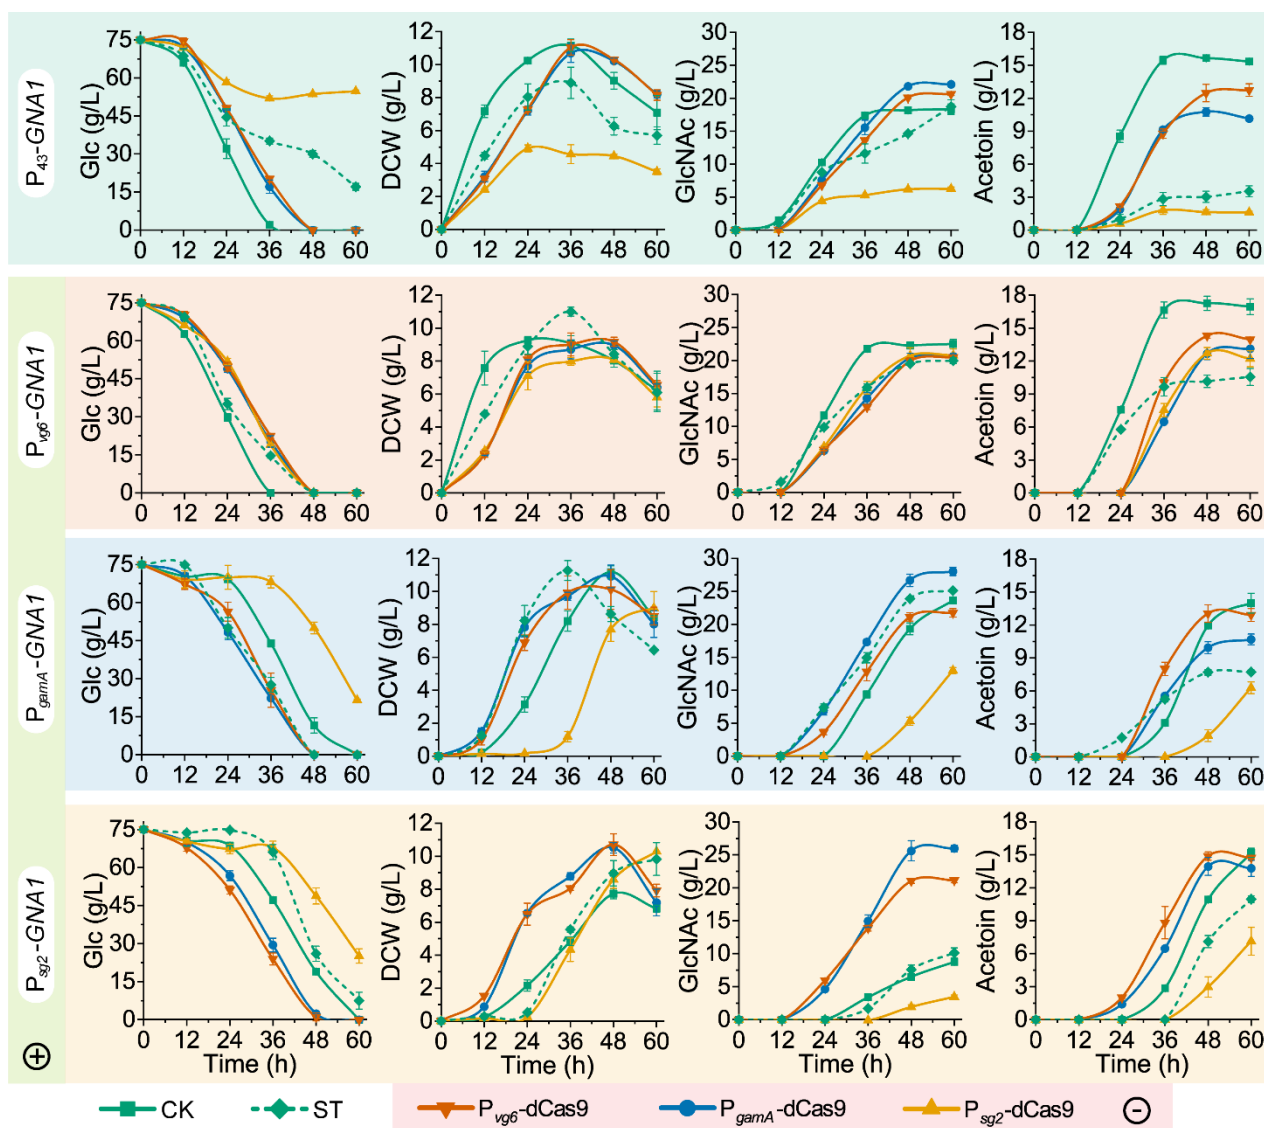

**Figure S9. Dynamic regulation of GlcNAc synthesis by the GlcN6P biosensors.** CK: control strain that only possessed dCas9 without sgRNAs. ST: statically upregulating *ptsG* and *pgi* (The promoters of *ptsG* and *pgi* in strain BNY0 were both replaced with  $P_{43}$ , and *GNA1* was expressed by  $P_{43}$ ,  $P_{vg6}$ ,  $P_{gamA}$ , and  $P_{sg2}$ , respectively.) All data were the average of three independent studies with standard deviations.

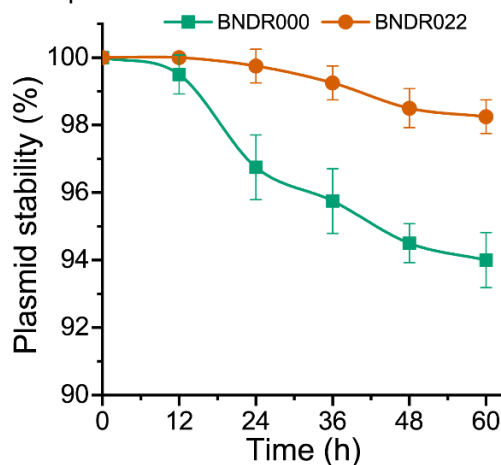

**Figure S10. Plasmid stability of cultures over time span in strains BNDR000 and BNDR022.**

**References**

1. Yan,X., Yu,H.J., Hong,Q. and Li,S.P. (2008) Cre/lox system and PCR-based genome engineering in *Bacillus subtilis*. *Appl. Environ. Microbiol.*, **74**, 5556–5562.
2. Phan,T.T.P., Nguyen,H.D. and Schumann,W. (2012) Development of a strong intracellular expression system for *Bacillus subtilis* by optimizing promoter elements. *J. Biotechnol.*, **157**, 167–172.
3. Biedendieck,R., Yang,Y., Deckwer,W.D., Malten,M. and Jahn,D. (2007) Plasmid system for the intracellular production and purification of affinity-tagged proteins in *Bacillus megaterium*. *Biotechnol. Bioeng.*, **96**, 525–537.
4. Liu,Y., Zhu,Y., Li,J., Shin,H.D., Chen,R.R., Du,G., Liu,L. and Chen,J. (2014) Modular pathway engineering of *Bacillus subtilis* for improved N-acetylglucosamine production. *Metab. Eng.*, **23**, 42–52.
5. Yang,S., Du,G., Chen,J. and Kang,Z. (2017) Characterization and application of endogenous phase-dependent promoters in *Bacillus subtilis*. *Appl. Microbiol. Biotechnol.*, **101**, 4151–4161.
6. Wu,Y., Chen,T., Liu,Y., Lv,X., Li,J., Du,G., Ledesma-Amaro,R. and Liu,L. (2018) CRISPRi allows optimal temporal control of N-acetylglucosamine bioproduction by a dynamic coordination of glucose and xylose metabolism in *Bacillus subtilis*. *Metab. Eng.*, **49**, 232–241.
